# Supplementary material for: Phosphate protected fluoride nano-phosphors
Source: Royal Society of Chemistry journal article supplement (doi:10.1039/c2jm15471d), 2012-01-01
Supplement: c2jm15471d.pdf [file c2jm15471d.pdf]

## Supporting Information

### 1. Chemicals

Gd(OAc)<sub>3</sub>·4 H<sub>2</sub>O (99.9 %) and Eu(OAc)<sub>3</sub>·H<sub>2</sub>O (99.9 %) were purchased from ABCR. The ionic liquids [choline][H<sub>2</sub>PO<sub>4</sub>] (98 %) and [choline][BF<sub>4</sub>] (99 %) were purchased from Iolitec. The solvents were purchased from Fisher Scientific (dichloromethane, 99.9%), Sigma-Aldrich (Ethanol, abs.) and J. T. Baker (ethylene glycole, 99%). All chemicals were used without further purification.

### 2. Electron Microscopy (TEM and EDX)

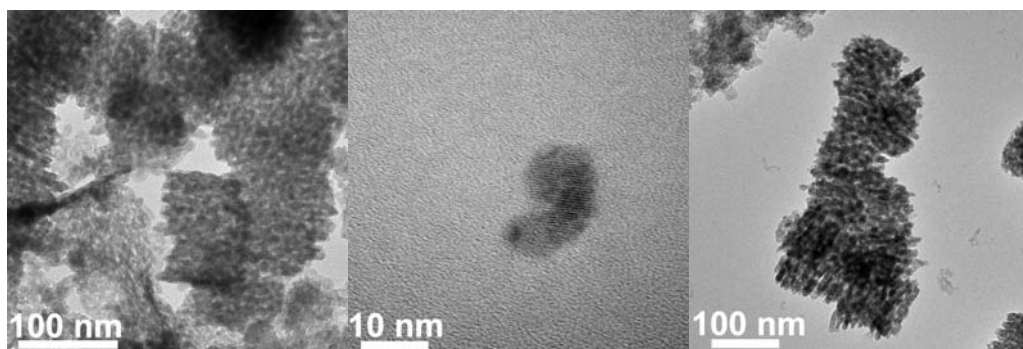

SI-Figure 1. TEM micrographs of the as-prepared, surface modified material.

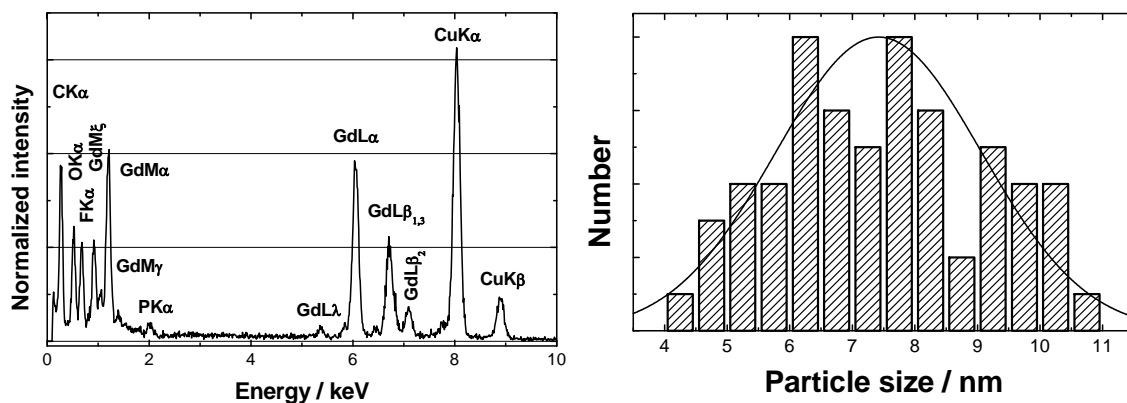

SI-Figure 2. EDX and particle size distribution of the as-prepared, surface modified material.

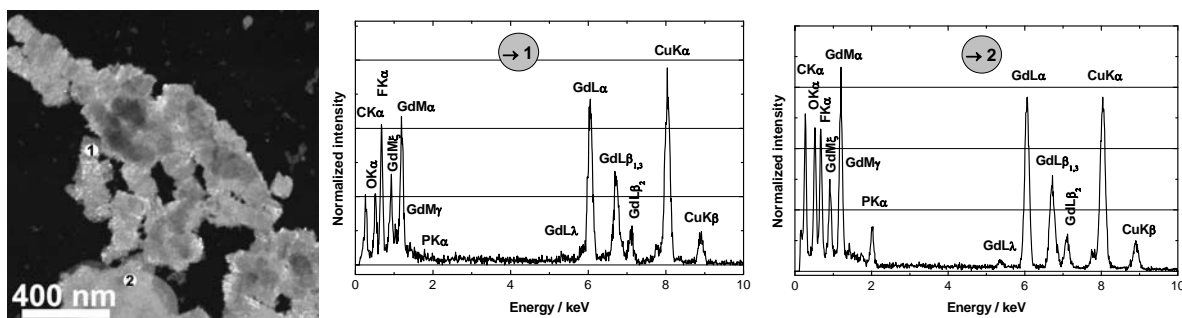

SI-Figure 3. TEM micrograph and corresponding EDX of the as-prepared material illustrating the core-shell structure.

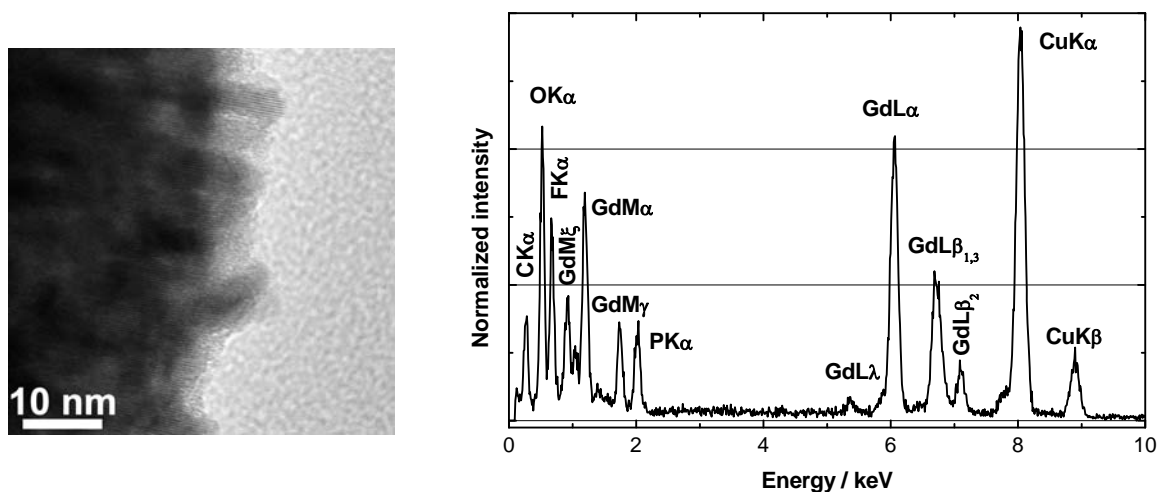

**SI-Figure 4.** TEM micrograph and EDX of the material after heat treatment at 850 °C.

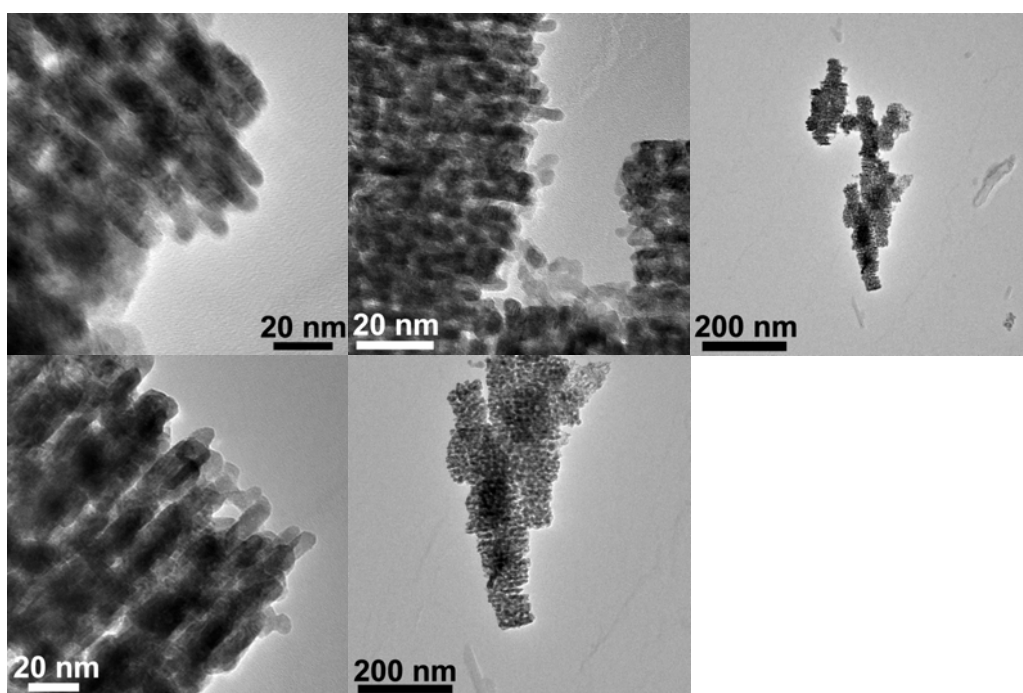

**SI-Figure 5.** TEM micrographs of pure, non-coated  $GdF_3:Eu^{3+}$ .

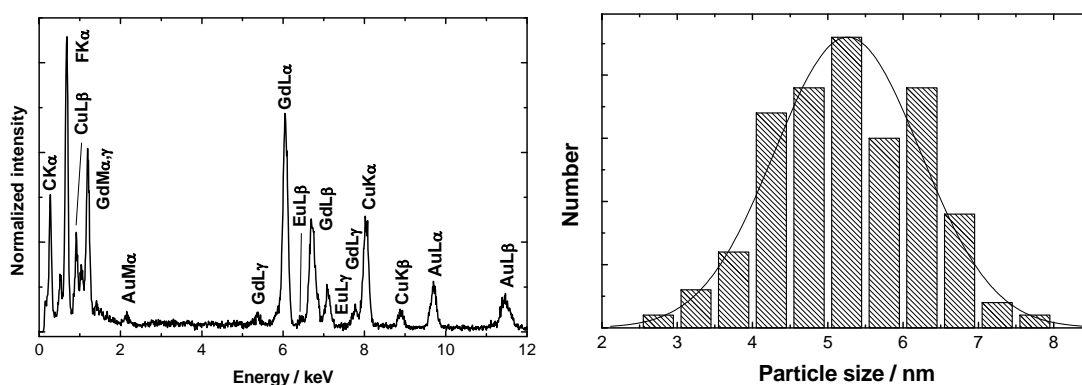

**SI-Figure 6.** EDX and particle size analysis of pure, non-coated  $GdF_3:Eu^{3+}$ .

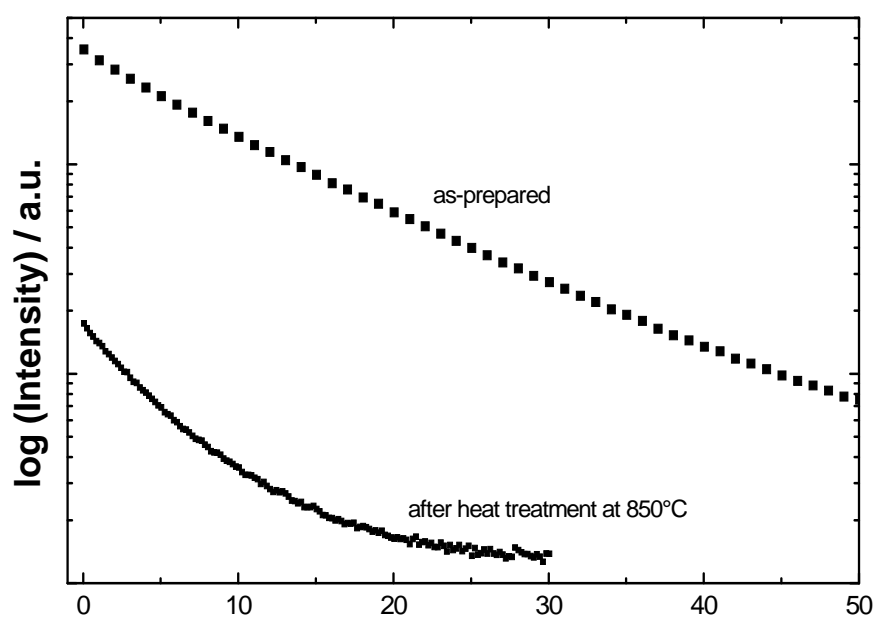

**SI-Figure 7.** Decay profiles of the as-prepared phosphate coated  $\text{GdF}_3:\text{Eu}^{3+}$  particles and after heat treatment at 850 °C.

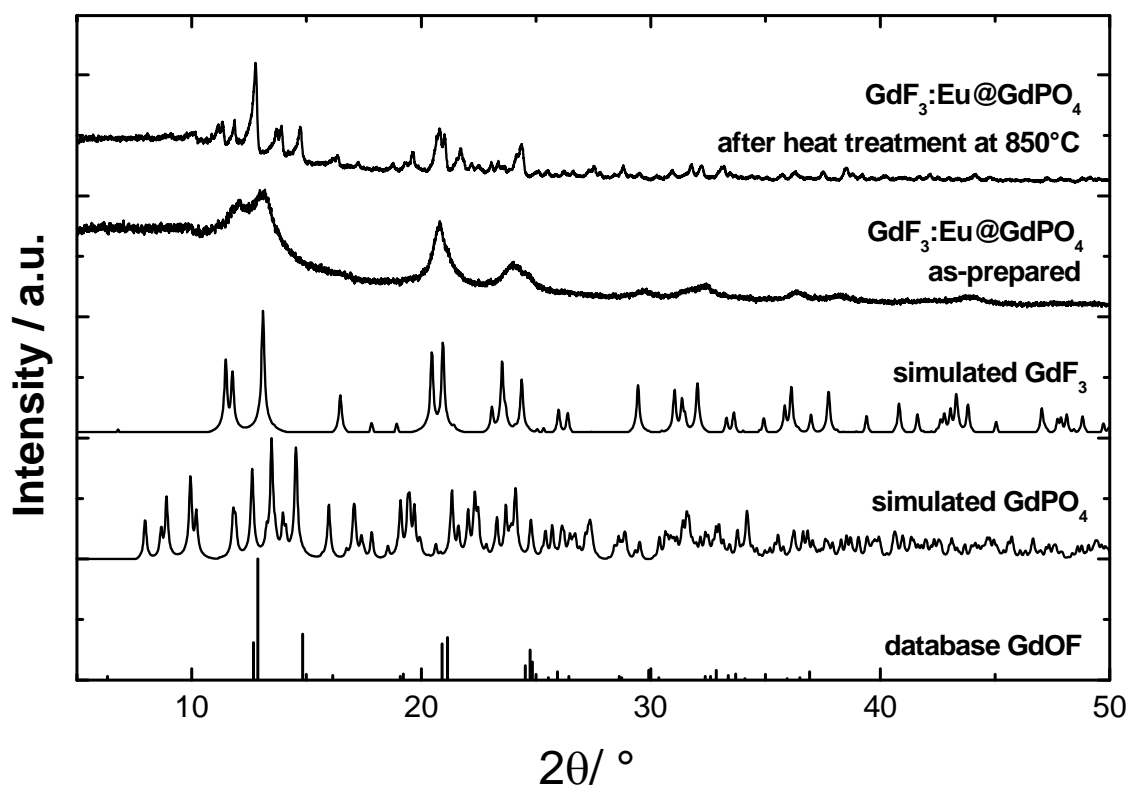

**SI-Figure 8.** Powder X-ray diffraction patterns of the as-prepared material as well as after heat treatment. Theoretical patterns of  $\text{GdF}_3$  and  $\text{GdPO}_4$  simulated from single crystal X-ray data together with the database pattern of  $\text{GdOF}$  as a potential contamination.
